# Supplementary material for: Response relationship between atmospheric O 3 and its precursors in Beijing based on smog chamber simulation and a revised MCM model
Source: Copernicus journal article supplement (doi:10.5194/egusphere-2025-3956), 2025-09-12
Supplement: Supplementary file 1 [file egusphere-2025-3956-supplement.pdf]

*Supplement of*

## **Response relationship between atmospheric O<sub>3</sub> and its precursors in Beijing based on smog chamber simulation and a revised MCM model**

Jialin Lu<sup>1, 2</sup>, Tianzeng Chen<sup>1, 2, \*</sup>, Jun Liu<sup>1, 2</sup>, Huiying Xuan<sup>1, 2</sup>, Peng Zhang<sup>1, 2</sup>, Qingxin Ma<sup>2, 3</sup>, Yonghong  
5 Wang<sup>1, 2</sup>, Hao Li<sup>1, 2</sup>, Biwu Chu<sup>2, 3, \*</sup>, Hong He<sup>1, 2, 4</sup>

<sup>1</sup>Laboratory of Atmospheric Environment and Pollution Control, Research Center for Eco-Environmental Sciences, Chinese Academy of Sciences, Beijing 100085, China

<sup>2</sup>University of Chinese Academy of Sciences, Beijing 100049, China

<sup>3</sup>State Key Laboratory of Regional Environment and Sustainability, Research Center for Eco-Environmental Sciences, Chinese  
10 Academy of Sciences, Beijing, 100085, China

<sup>4</sup>State Key Laboratory of Advanced Environmental Technology, Institute of Urban Environment, Xiamen 361021, China

*Correspondence to:* tzchen@rcees.ac.cn (Tianzeng Chen) and bwchu@rcees.ac.cn (Biwu Chu)

15

20

25

30

### Calculation process of Normalized Mean Bias (NMB):

$$\text{NMB} = \frac{\sum_{i=1}^n (P_i - O_i)}{\sum_{i=1}^n O_i} \times 100 \%$$

P represents the simulated value, and O denotes the measured value.

- 35 NMB is a commonly used indicator for evaluating the performance of atmospheric models. It is mainly used to quantify the direction and magnitude of the systematic deviation of model simulated values relative to measured values. NMB also conducts the comparison of discrepancies between different data or different models through standardization processing (Zheng et al., 2024; Xuan et al., 2024).

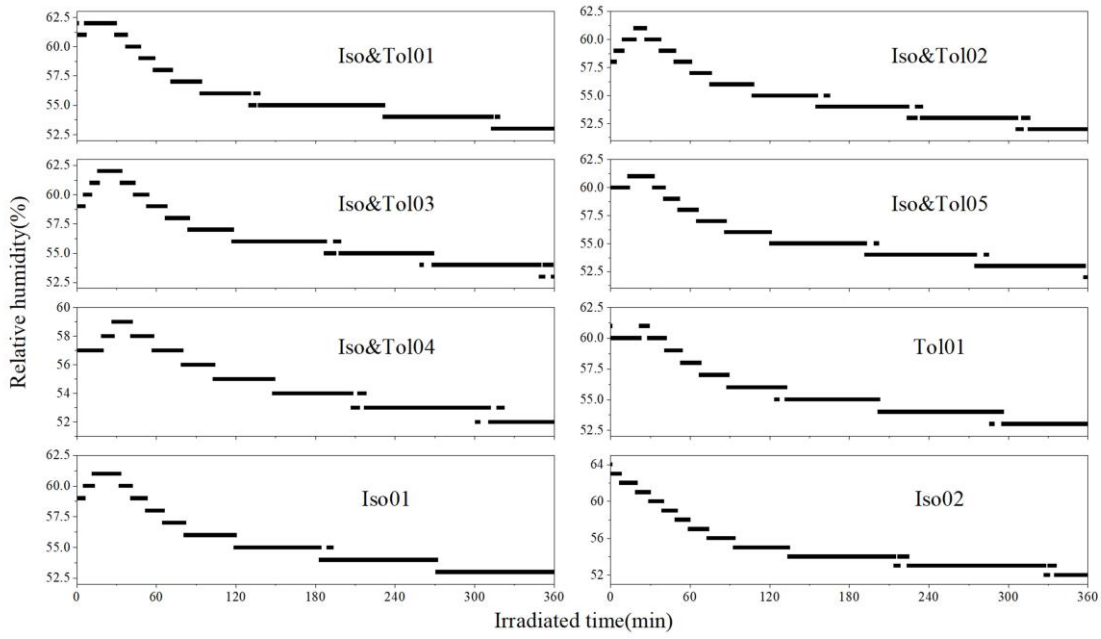

Figure S1: Variations in relative humidity of smog chamber during the experimental process.

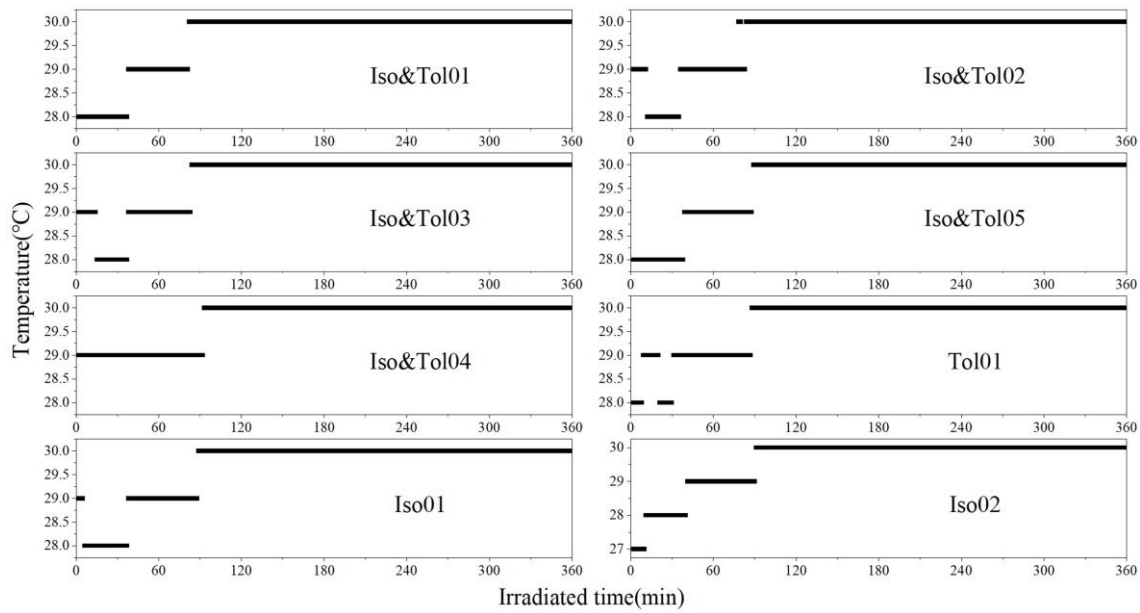

Figure S2: Variations in temperature of smog chamber during the experimental process.

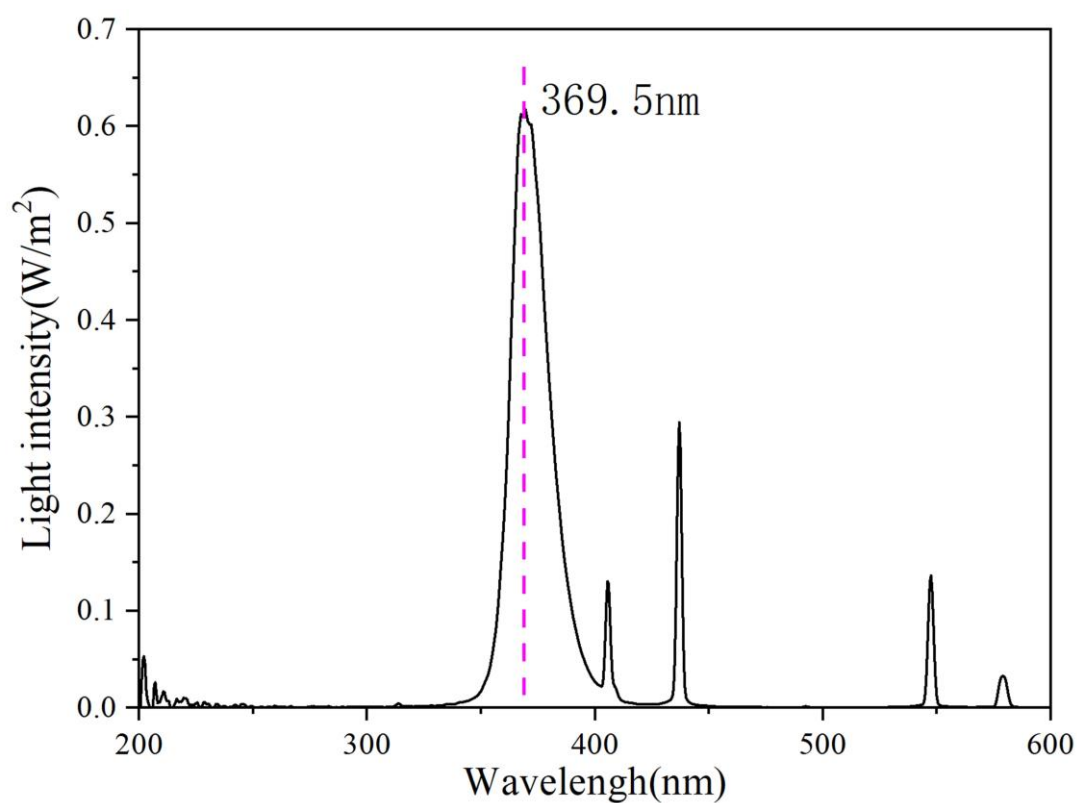

Figure S3: The ultraviolet spectra during the smog chamber experiments.

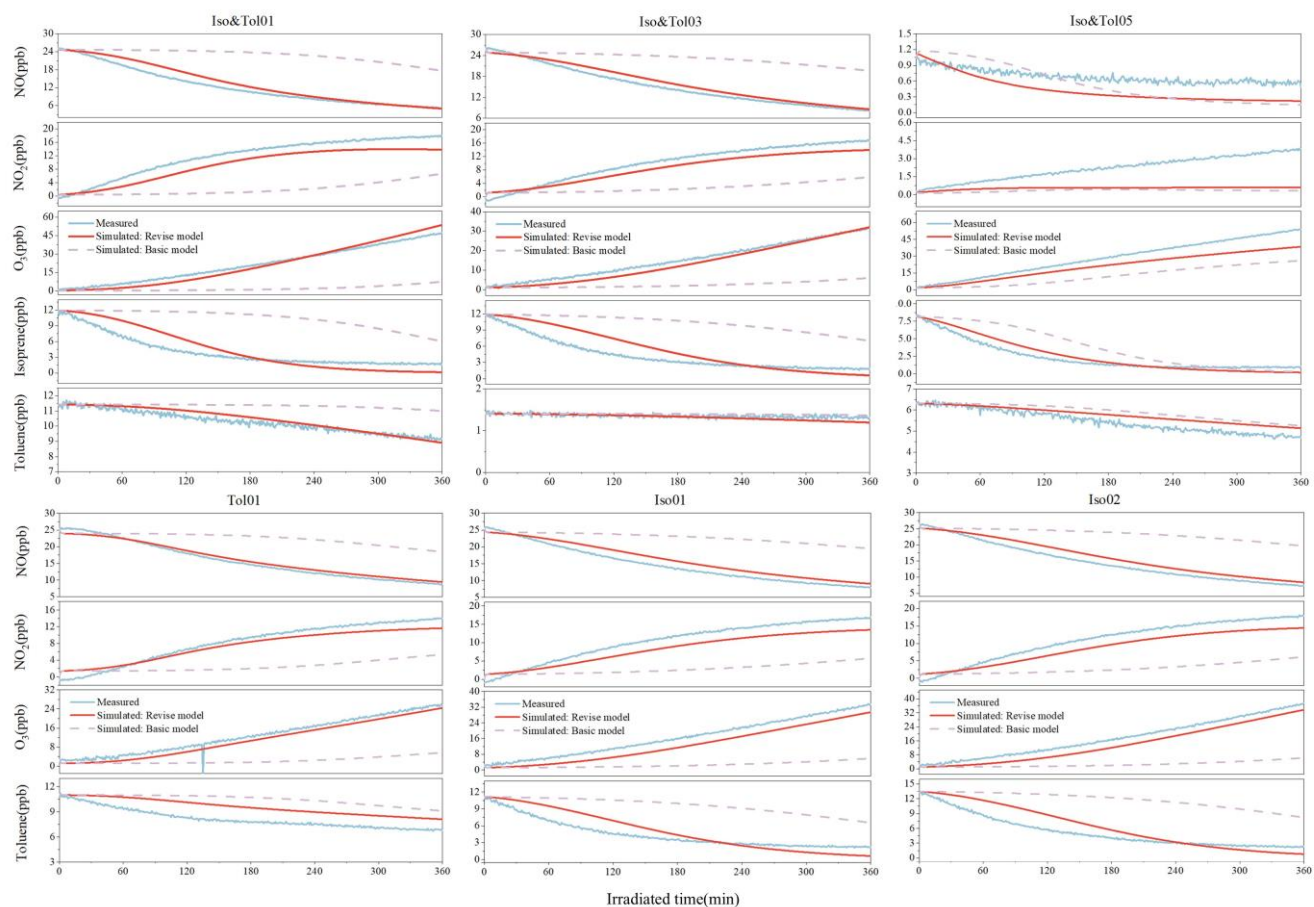

50 **Figure S4: Time series of NO, NO<sub>2</sub>, O<sub>3</sub>, and VOCs concentrations during the photochemical reaction process in different experiments.** The curves in different colors corresponding to the measured concentrations, the results from the basic model simulation, and the results from the revised model simulation. The NMB values for O<sub>3</sub> simulated by the basic model in experiments Iso&Tol01, Iso&Tol03, Iso&Tol05, Tol01, Iso01 and Iso02 were -91.1 %, -83.9 %, -56.9 %, -81.9 %, -84.4 % and -85.7 %, respectively. And that simulated by the revised model were -3.8 %, -12.5 %, -26.6 %, -13.8 %, -24.1 % and -21.6 %, respectively.

55

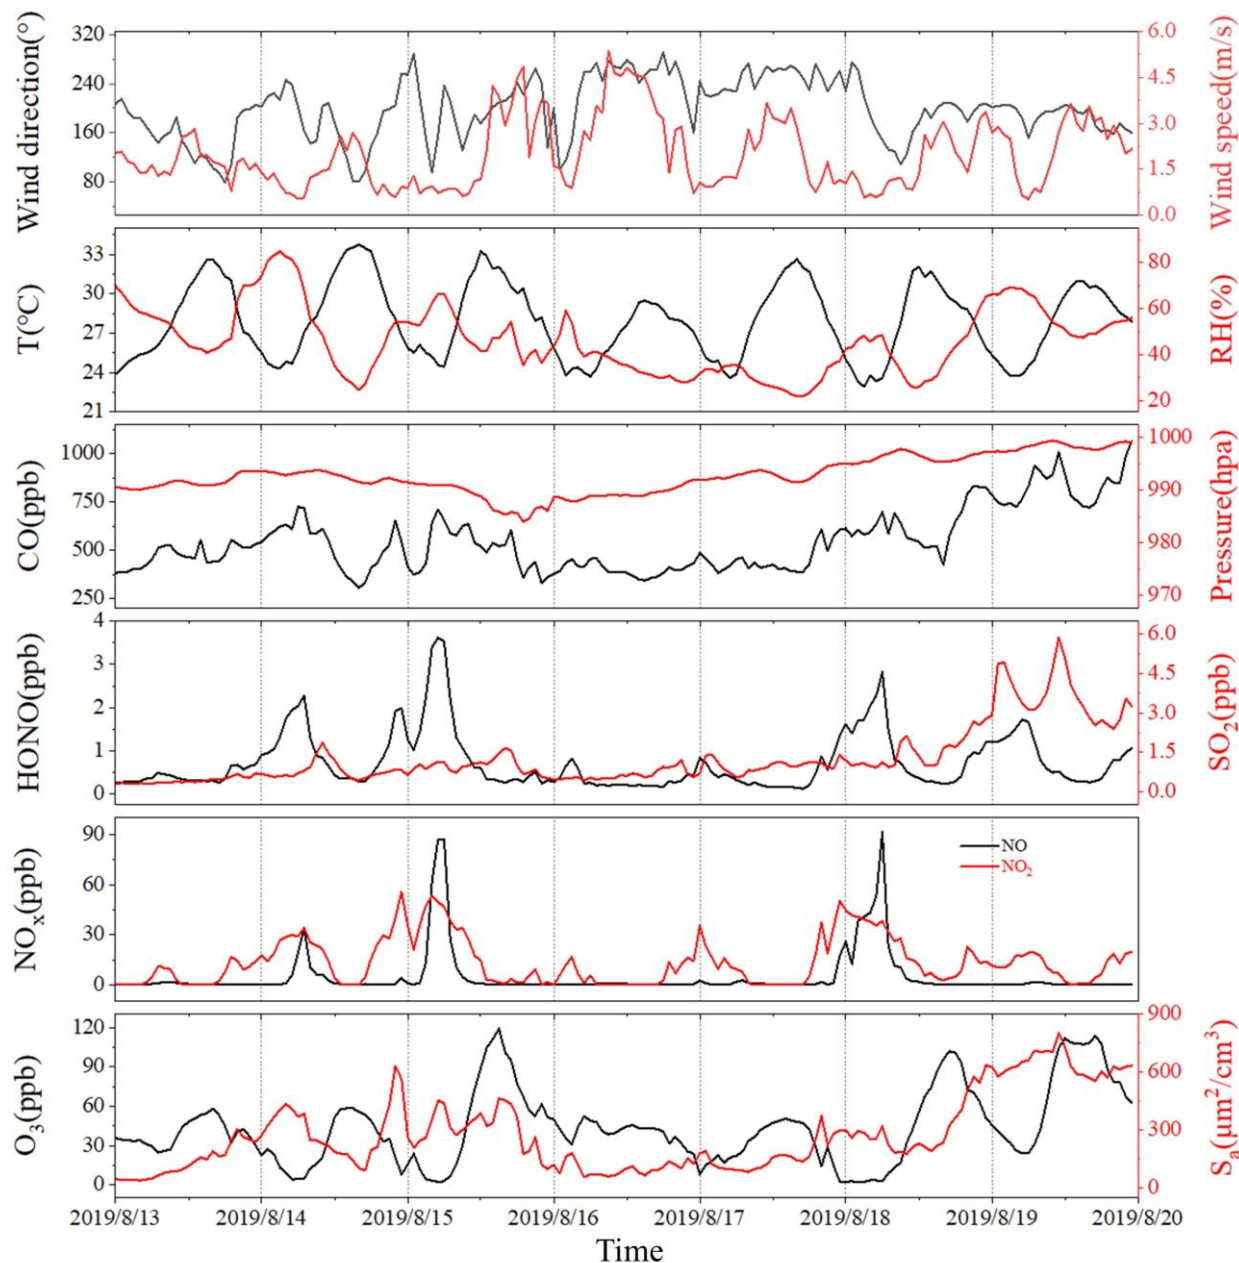

**Figure S5: Time series of observed species concentrations and meteorological parameters in Daxing, Beijing from August 13–19, 2019.**

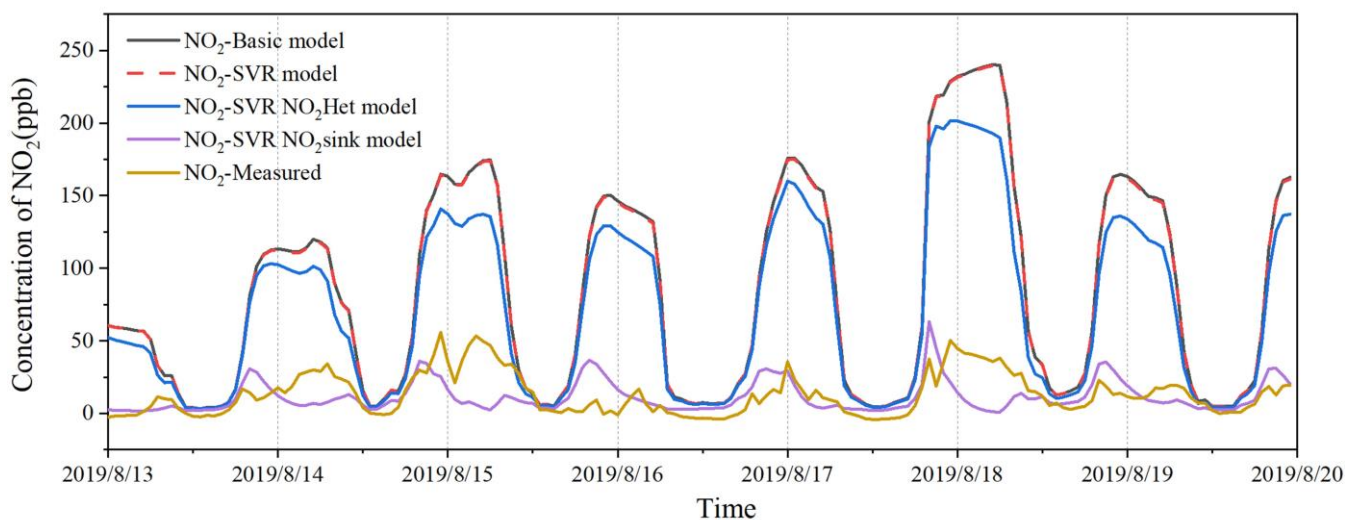

60

**Figure S6:** Measured concentrations of NO<sub>2</sub> and the simulation results of different models in Daxing, Beijing from August 13–19, 2019. The NMB values for NO<sub>2</sub> simulated by the Basic model, SVR model, SVR NO<sub>2</sub>Het model, and SVR NO<sub>2</sub>sink model were 539.8 %, 536.7 %, 436.7 % and -13.3 %, respectively.

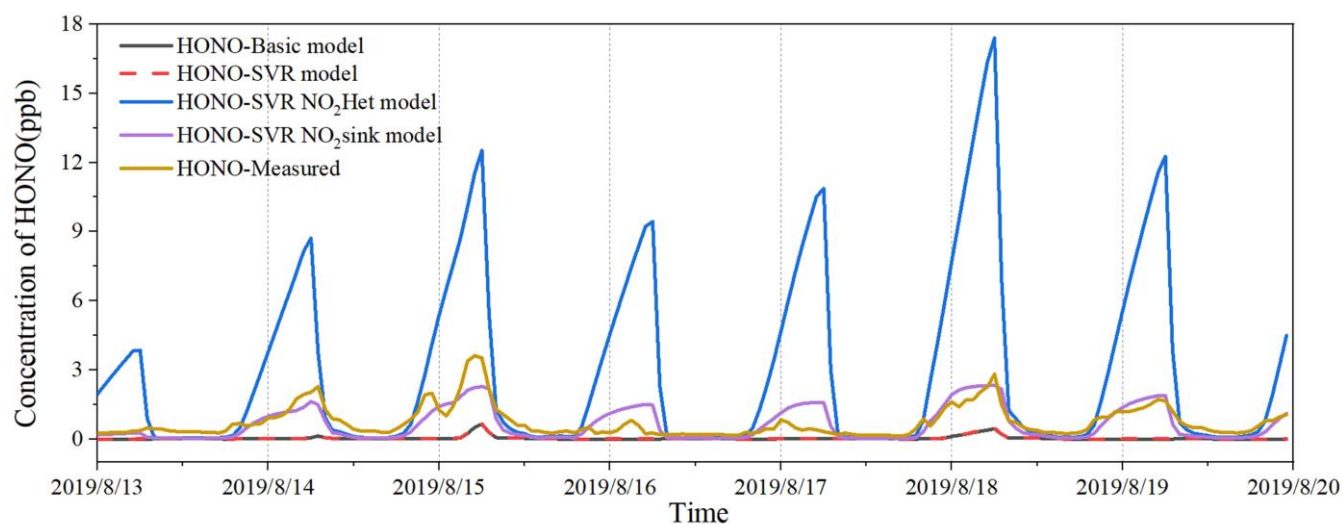

65

**Figure S7:** Measured concentrations of HONO and the simulation results of different models in Daxing, Beijing from August 13–19, 2019. The NMB values for HONO simulated by the Basic model, SVR model, SVR NO<sub>2</sub>Het model, and SVR NO<sub>2</sub>sink model were -94.8 %, -94.3 %, 305.6 % and -12.4 %, respectively.

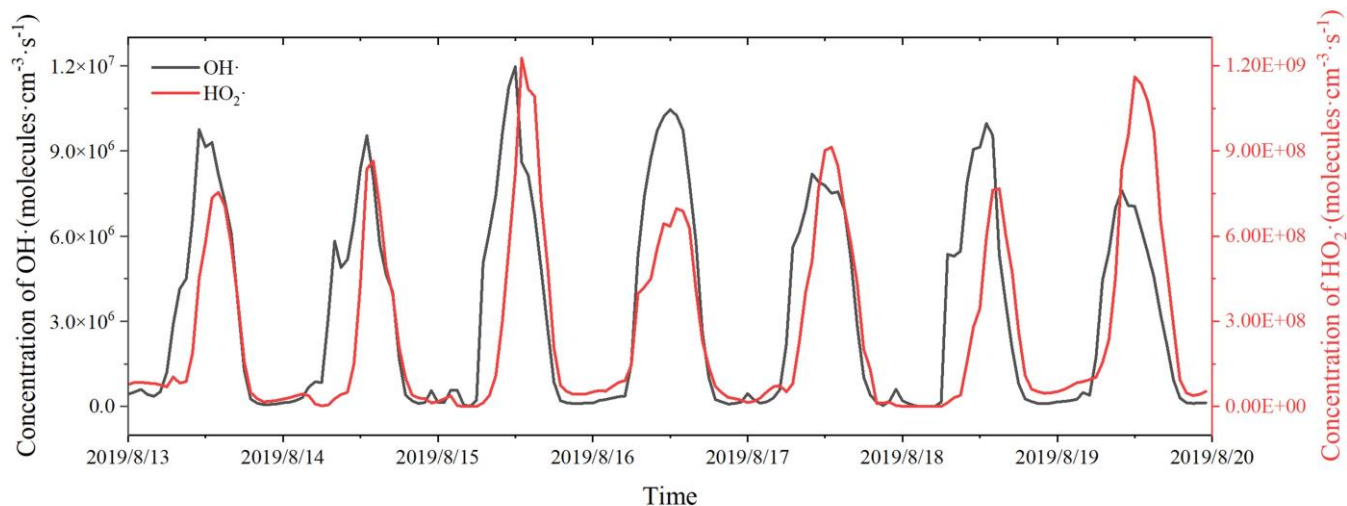

70

**Figure S8: Simulated concentrations of OH and HO<sub>2</sub> radicals by SVR NO<sub>2</sub>sink model in Daxing, Beijing from August 13–19, 2019.**

**Table S1: Photolysis rate constants used in the MCM box model for simulating smog chamber experiments.**

|     |          |     |          |     |          |
|-----|----------|-----|----------|-----|----------|
| J1  | 1.05E-05 | J2  | 2.52E-06 | J3  | 4.85E-06 |
| J4  | 9.20E-03 | J5  | 2.17E-05 | J6  | 5.37E-05 |
| J7  | 2.03E-03 | J8  | 5.66E-07 | J11 | 1.94E-06 |
| J12 | 2.20E-06 | J13 | 9.73E-07 | J14 | 1.61E-06 |
| J15 | 5.20E-07 | J16 | 2.48E-07 | J17 | 2.31E-06 |
| J18 | 5.12E-07 | J19 | 5.12E-07 | J20 | 2.63E-04 |
| J21 | 3.10E-07 | J22 | 2.81E-07 | J23 | 3.08E-07 |
| J24 | 3.08E-07 | J31 | 5.62E-07 | J32 | 5.17E-06 |
| J33 | 3.24E-05 | J34 | 3.85E-05 | J35 | 7.34E-05 |
| J41 | 4.56E-07 | J51 | 9.22E-07 | J52 | 1.76E-07 |
| J53 | 2.71E-04 | J54 | 2.86E-04 | J55 | 1.08E-06 |
| J56 | 7.26E-06 |     |          |     |          |

75

**Table S2: Constrained species in AtChem2-MCM.**

|                      |                                                                                                                                                                                                                                                                                                                                                                                                                                                                                                        |
|----------------------|--------------------------------------------------------------------------------------------------------------------------------------------------------------------------------------------------------------------------------------------------------------------------------------------------------------------------------------------------------------------------------------------------------------------------------------------------------------------------------------------------------|
| Parameters category  | Parameters                                                                                                                                                                                                                                                                                                                                                                                                                                                                                             |
| Trace species        | NO, CO, SO <sub>2</sub>                                                                                                                                                                                                                                                                                                                                                                                                                                                                                |
| Photolysis frequency | J4                                                                                                                                                                                                                                                                                                                                                                                                                                                                                                     |
| Meteorology          | TEMP, PRESS, RH, ASA                                                                                                                                                                                                                                                                                                                                                                                                                                                                                   |
| VOCs                 | HCHO, CH <sub>3</sub> CHO, C <sub>3</sub> H <sub>6</sub> , C <sub>4</sub> ALDB, C <sub>2</sub> H <sub>5</sub> CHO, C <sub>5</sub> H <sub>8</sub> , TM123B, C <sub>4</sub> H <sub>6</sub> , C <sub>3</sub> H <sub>7</sub> CHO, MXYL, CCL <sub>2</sub> CH <sub>2</sub> , TOLUENE, C <sub>4</sub> H <sub>9</sub> CHO, CH <sub>3</sub> COCH <sub>3</sub> , VINCL, C <sub>5</sub> H <sub>11</sub> CHO, NC <sub>4</sub> H <sub>10</sub> , PENT1ENE, NC <sub>11</sub> H <sub>24</sub> , HEX1ENE (name in MCM) |

## References

- Xuan, H., Liu, J., Zhao, Y., Cao, Q., Chen, T., Wang, Y., Liu, Z., Sun, X., Li, H., Zhang, P., Chu, B., Ma, Q., and He, H.:  
80 Relative humidity driven nocturnal HONO formation mechanism in autumn haze events of Beijing, *npj Climate and Atmospheric Science*, 7, 193, 10.1038/s41612-024-00745-8, 2024.
- Zheng, H., Gen, M., Sun, Y., Xu, W., Ma, N., Su, H., Cheng, Y., Wang, S., Xing, J., Zhang, S., Xue, L., Xue, C., Mu, Y., Tian, X., Matsuki, A., and Song, S.: Rapid hydrolysis of NO<sub>2</sub> at High Ionic Strengths of Deliquesced Aerosol Particles, *Environmental Science & Technology*, 58, 7904-7915, 10.1021/acs.est.3c08810, 2024.

85
